# Supplementary figures and images for: A Trigger and Response System for Preventing Cardiac Arrest in the ICU
Source: PubMed Central journal article supplement — Crit Care Explor. 2021 Oct 18;3(10):e0557. doi: 10.1097/CCE.0000000000000557 (PMC8553241; doi:10.1097/cce.0000000000000557), 2021-10-18

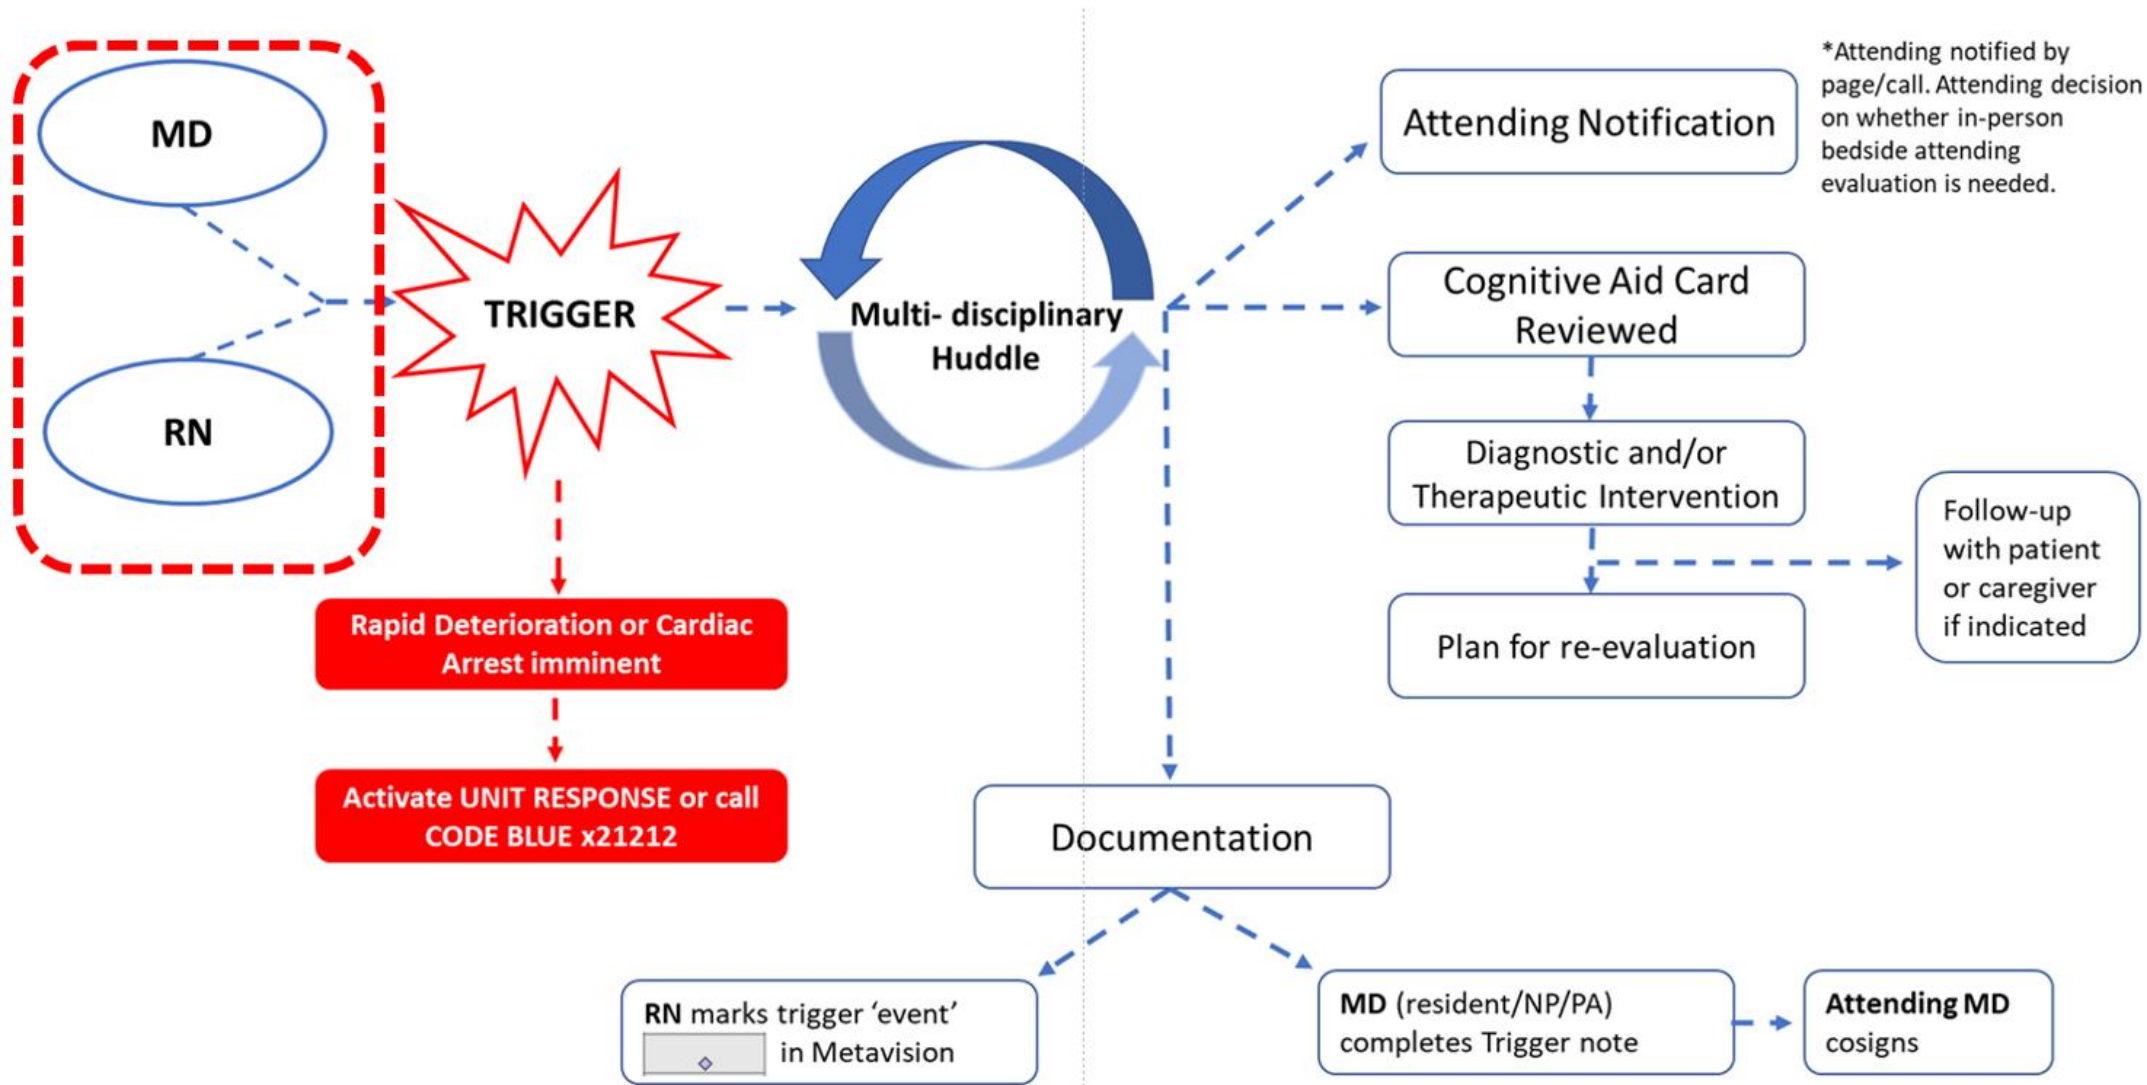

Supplement: cc9-3-e0557-s002.pdf [file cc9-3-e0557-s002.pdf]
